# Supplementary material for: A Multicriteria Approach to Find Predictive and Sparse Models with Stable Feature Selection for High-Dimensional Data
Source: Hindawi journal article supplement (doi:10.1155/2017/7907163), 2017-01-01
Supplement: f1 [file 7907163.f1.pdf]

Supplementary Material for

“A Multicriteria Approach to Find Predictive and Sparse Models with  
Stable Feature Selection for High-Dimensional Data”

Andrea Bommert, Jörg Rahnenführer, and Michel Lang

**Results of the Study for Finding Desirable Configurations for All Stability Measures**

|                        |           |
|------------------------|-----------|
| <b>AP_Breast_Ovary</b> | <b>2</b>  |
| <b>AP_Colon_Kidney</b> | <b>6</b>  |
| <b>Stomach</b>         | <b>12</b> |

# AP\_Breast\_Ovary

| ID | Classifier       | Parameters                              | Filter   | n.feats | Error<br>(train) | Error<br>(test) | Size<br>(train) | Size<br>(test) |
|----|------------------|-----------------------------------------|----------|---------|------------------|-----------------|-----------------|----------------|
| 1  | Lasso. Log. Reg. | $\lambda = 0.0002$                      | Variance | 10933   | 0.037            | 0.056           | 10932.8         | 10932.4        |
| 2  | Lasso. Log. Reg. | $\lambda = 0.001$                       | Variance | 10865   | 0.026            | 0.048           | 10864.2         | 10863.6        |
| 3  | Lasso. Log. Reg. | $\lambda = 0.001$                       | Variance | 10725   | 0.045            | 0.026           | 10724.0         | 10724.0        |
| 4  | Lasso. Log. Reg. | $\lambda = 0.0005$                      | Variance | 10622   | 0.033            | 0.044           | 10621.8         | 10621.7        |
| 5  | Lasso. Log. Reg. | $\lambda = 0.0001$                      | Variance | 10543   | 0.037            | 0.040           | 10542.9         | 10542.7        |
| 6  | Lasso. Log. Reg. | $\lambda = 0.0001$                      | Variance | 10509   | 0.019            | 0.040           | 10508.9         | 10508.9        |
| 7  | Lasso. Log. Reg. | $\lambda = 0.003$                       | Variance | 10488   | 0.026            | 0.052           | 10484.6         | 10485.0        |
| 8  | Lasso. Log. Reg. | $\lambda = 0.0001$                      | Variance | 10477   | 0.033            | 0.044           | 10476.9         | 10476.9        |
| 9  | Lasso. Log. Reg. | $\lambda = 0.003$                       | Variance | 10448   | 0.044            | 0.037           | 10445.2         | 10445.2        |
| 10 | Random Forest    | num.trees = 18741,<br>min.node.size = 1 | Variance | 10447   | 0.040            | 0.022           | 10403.8         | 10407.5        |
| 11 | Lasso. Log. Reg. | $\lambda = 0.0001$                      | Variance | 10313   | 0.030            | 0.026           | 10312.7         | 10312.7        |
| 12 | Lasso. Log. Reg. | $\lambda = 0.001$                       | Variance | 10256   | 0.022            | 0.048           | 10254.7         | 10255.8        |
| 13 | Lasso. Log. Reg. | $\lambda = 0.014$                       | Variance | 10196   | 0.030            | 0.052           | 10183.8         | 10185.4        |
| 14 | Lasso. Log. Reg. | $\lambda = 0.004$                       | Variance | 10044   | 0.033            | 0.037           | 10040.6         | 10041.0        |
| 15 | Lasso. Log. Reg. | $\lambda = 0.00005$                     | Variance | 10030   | 0.044            | 0.030           | 10030.0         | 10029.9        |
| 16 | Lasso. Log. Reg. | $\lambda = 0.0005$                      | Variance | 9995    | 0.033            | 0.033           | 9994.6          | 9994.7         |
| 17 | Lasso. Log. Reg. | $\lambda = 0.019$                       | Variance | 9926    | 0.019            | 0.055           | 9910.4          | 9910.7         |
| 18 | Lasso. Log. Reg. | $\lambda = 0.025$                       | Variance | 9927    | 0.023            | 0.030           | 9906.2          | 9905.8         |
| 19 | Lasso. Log. Reg. | $\lambda = 0.003$                       | Variance | 9523    | 0.022            | 0.022           | 9521.0          | 9520.8         |
| 20 | Lasso. Log. Reg. | $\lambda = 0.0002$                      | Variance | 9373    | 0.026            | 0.052           | 9373.0          | 9372.8         |
| 21 | Lasso. Log. Reg. | $\lambda = 0.00004$                     | Variance | 9239    | 0.022            | 0.041           | 9239.0          | 9239.0         |
| 22 | Lasso. Log. Reg. | $\lambda = 0.0003$                      | Variance | 8945    | 0.029            | 0.030           | 8944.9          | 8944.9         |
| 23 | SVM              | $C = 4424.956,$<br>$\sigma = 0.00003$   | Variance | 8939    | 0.044            | 0.026           | 8939.0          | 8939.0         |
| 24 | Lasso. Log. Reg. | $\lambda = 0.0004$                      | Variance | 8843    | 0.037            | 0.041           | 8843.0          | 8843.0         |
| 25 | Lasso. Log. Reg. | $\lambda = 0.0001$                      | Variance | 8837    | 0.040            | 0.026           | 8837.0          | 8836.9         |
| 26 | Lasso. Log. Reg. | $\lambda = 0.005$                       | Variance | 8615    | 0.022            | 0.051           | 8612.9          | 8612.5         |
| 27 | Lasso. Log. Reg. | $\lambda = 0.01$                        | Variance | 8198    | 0.037            | 0.041           | 8193.8          | 8192.8         |
| 28 | Lasso. Log. Reg. | $\lambda = 0.0002$                      | Variance | 7767    | 0.040            | 0.019           | 7767.0          | 7766.7         |
| 29 | Lasso. Log. Reg. | $\lambda = 0.001$                       | Variance | 7042    | 0.048            | 0.037           | 7041.5          | 7041.9         |
| 30 | Random Forest    | num.trees = 24717,<br>min.node.size = 2 | Variance | 6522    | 0.036            | 0.026           | 6521.7          | 6521.7         |
| 31 | Lasso. Log. Reg. | $\lambda = 0.0001$                      | Variance | 5371    | 0.033            | 0.040           | 5371.0          | 5371.0         |
| 32 | Lasso. Log. Reg. | $\lambda = 0.002$                       | Variance | 4363    | 0.026            | 0.048           | 4362.8          | 4362.8         |
| 33 | Lasso. Log. Reg. | $\lambda = 0.00005$                     | Variance | 420     | 0.041            | 0.041           | 420.0           | 420.0          |
| 34 | Random Forest    | num.trees = 20577,<br>min.node.size = 2 | Variance | 397     | 0.041            | 0.048           | 397.0           | 397.0          |
| 35 | SVM              | $C = 81.668,$<br>$\sigma = 0.0001$      | Variance | 355     | 0.040            | 0.044           | 355.0           | 355.0          |
| 36 | Lasso. Log. Reg. | $\lambda = 51.202$                      | Variance | 349     | 0.048            | 0.030           | 347.5           | 346.9          |
| 37 | Lasso. Log. Reg. | $\lambda = 2.06$                        | Variance | 246     | 0.041            | 0.059           | 246.0           | 245.9          |
| 38 | Lasso. Log. Reg. | $\lambda = 0.133$                       | Variance | 232     | 0.037            | 0.044           | 232.0           | 232.0          |
| 39 | Random Forest    | num.trees = 4742,<br>min.node.size = 2  | Variance | 212     | 0.048            | 0.044           | 212.0           | 212.0          |
| 40 | Lasso. Log. Reg. | $\lambda = 0.085$                       | Variance | 174     | 0.044            | 0.048           | 174.0           | 174.0          |
| 41 | GLM Boosting     | $m_{\text{stop}} = 27$                  | Variance | 728     | 0.041            | 0.041           | 13.3            | 15.1           |
| 42 | GLM Boosting     | $m_{\text{stop}} = 25$                  | Variance | 363     | 0.048            | 0.074           | 9.8             | 7.2            |
| 43 | GLM Boosting     | $m_{\text{stop}} = 13$                  | AUC      | 232     | 0.048            | 0.077           | 9.7             | 11.0           |
| 44 | Random Forest    | num.trees = 1062,<br>min.node.size = 3  | MRMR     | 1756    | 0.000            | 0.055           | 1466.0          | 1611.9         |
| 45 | Random Forest    | num.trees = 4671,<br>min.node.size = 11 | AUC      | 760     | 0.000            | 0.051           | 759.7           | 760.0          |

Table A: All Pareto optimal configurations for data set AP\_Breast\_Ovary (above the horizontal line) and accuracy optimal configurations (below the horizontal line). The ID column references Tables B, C, and D.

| ID | 1 - SJ<br>(train) | 1 - SJ<br>(test) | 1 - SC<br>(train) | 1 - SC<br>(test) | 1 - SD-1<br>(train) | 1 - SD-1<br>(test) | 1 - SD-10<br>(train) | 1 - SD-10<br>(test) |
|----|-------------------|------------------|-------------------|------------------|---------------------|--------------------|----------------------|---------------------|
| 1  | 0.000             | 0.000            | —                 | —                | —                   | —                  | —                    | —                   |
| 2  | 0.002             | 0.003            | —                 | —                | —                   | —                  | —                    | —                   |
| 3  | 0.010             | 0.007            | —                 | —                | —                   | —                  | —                    | —                   |
| 4  | 0.011             | 0.014            | —                 | —                | —                   | —                  | —                    | —                   |
| 5  | 0.015             | 0.017            | —                 | —                | —                   | —                  | —                    | —                   |
| 6  | 0.015             | 0.019            | —                 | —                | —                   | —                  | —                    | —                   |
| 7  | 0.017             | 0.018            | —                 | —                | —                   | —                  | —                    | —                   |
| 8  | 0.018             | 0.018            | —                 | —                | —                   | —                  | —                    | —                   |
| 9  | 0.023             | 0.018            | —                 | —                | —                   | —                  | —                    | —                   |
| 10 | —                 | —                | —                 | —                | —                   | —                  | —                    | —                   |
| 11 | —                 | —                | —                 | —                | —                   | —                  | —                    | —                   |
| 12 | 0.023             | 0.028            | —                 | —                | —                   | —                  | —                    | —                   |
| 13 | 0.029             | 0.032            | —                 | —                | —                   | —                  | —                    | —                   |
| 14 | 0.031             | 0.032            | —                 | —                | —                   | —                  | —                    | —                   |
| 15 | 0.031             | 0.032            | —                 | —                | —                   | —                  | —                    | —                   |
| 16 | 0.032             | 0.032            | —                 | —                | —                   | —                  | —                    | —                   |
| 17 | 0.034             | 0.038            | —                 | —                | —                   | —                  | —                    | —                   |
| 18 | —                 | —                | —                 | —                | —                   | —                  | —                    | —                   |
| 19 | 0.035             | 0.039            | —                 | —                | —                   | —                  | —                    | —                   |
| 20 | 0.037             | 0.038            | —                 | —                | —                   | —                  | —                    | —                   |
| 21 | —                 | —                | —                 | —                | —                   | —                  | —                    | —                   |
| 22 | 0.038             | 0.040            | —                 | —                | —                   | —                  | —                    | —                   |
| 23 | 0.038             | 0.040            | —                 | —                | —                   | —                  | —                    | —                   |
| 24 | 0.038             | 0.040            | —                 | —                | —                   | —                  | —                    | —                   |
| 25 | —                 | —                | —                 | —                | —                   | —                  | —                    | —                   |
| 26 | —                 | —                | —                 | —                | —                   | —                  | —                    | —                   |
| 27 | —                 | —                | —                 | —                | —                   | —                  | —                    | —                   |
| 28 | —                 | —                | —                 | —                | —                   | —                  | —                    | —                   |
| 29 | —                 | —                | —                 | —                | —                   | —                  | —                    | —                   |
| 30 | —                 | —                | —                 | —                | —                   | —                  | —                    | —                   |
| 31 | —                 | —                | —                 | —                | —                   | —                  | —                    | —                   |
| 32 | —                 | —                | —                 | —                | —                   | —                  | —                    | —                   |
| 33 | —                 | —                | —                 | —                | —                   | —                  | —                    | —                   |
| 34 | 0.039             | 0.046            | 0.021             | 0.025            | —                   | —                  | —                    | —                   |
| 35 | 0.040             | 0.054            | 0.021             | 0.029            | —                   | —                  | —                    | —                   |
| 36 | —                 | —                | —                 | —                | —                   | —                  | —                    | —                   |
| 37 | 0.041             | 0.060            | 0.021             | 0.032            | 0.062               | 0.091              | —                    | —                   |
| 38 | 0.047             | 0.060            | 0.025             | 0.032            | 0.066               | 0.097              | —                    | —                   |
| 39 | 0.063             | 0.054            | 0.034             | 0.028            | 0.081               | 0.073              | —                    | —                   |
| 40 | 0.072             | 0.057            | 0.038             | 0.030            | 0.100               | 0.090              | 0.243                | 0.234               |
| 41 | 0.178             | 0.340            | 0.100             | 0.208            | —                   | —                  | —                    | —                   |
| 42 | 0.206             | 0.283            | 0.117             | 0.169            | 0.247               | 0.447              | 0.255                | 0.453               |
| 43 | 0.482             | 0.503            | 0.325             | 0.341            | 0.597               | 0.561              | 0.605                | 0.570               |
| 44 | 0.345             | 0.284            | 0.240             | 0.195            | 0.455               | 0.441              | 1.000                | 1.000               |
| 45 | 0.131             | 0.158            | 0.075             | 0.092            | 0.253               | 0.277              | 0.879                | 0.903               |

Table B: Stability values for the Pareto optimal configurations in Table A. The ID column references Table A. “—” means that the configuration is not Pareto optimal for the corresponding stability measure.

| ID | 1 - SD-0<br>(train) | 1 - SD-0<br>(test) | 1 - SD-2<br>(train) | 1 - SD-2<br>(test) | 1 - SD<br>(train) | 1 - SD<br>(test) | 1 - SL<br>(train) | 1 - SL<br>(test) |
|----|---------------------|--------------------|---------------------|--------------------|-------------------|------------------|-------------------|------------------|
| 1  | 0.000               | 0.000              | —                   | —                  | 0.000             | 0.000            | 0.008             | 0.771            |
| 2  | 0.001               | 0.002              | —                   | —                  | 0.001             | 0.001            | —                 | —                |
| 3  | 0.006               | 0.005              | —                   | —                  | 0.005             | 0.004            | —                 | —                |
| 4  | 0.007               | 0.010              | —                   | —                  | 0.005             | 0.007            | —                 | —                |
| 5  | 0.010               | 0.012              | —                   | —                  | 0.007             | 0.009            | —                 | —                |
| 6  | 0.010               | 0.013              | —                   | —                  | 0.007             | 0.010            | —                 | —                |
| 7  | 0.011               | 0.013              | —                   | —                  | 0.008             | 0.009            | —                 | —                |
| 8  | 0.012               | 0.012              | —                   | —                  | 0.009             | 0.009            | —                 | —                |
| 9  | 0.015               | 0.013              | —                   | —                  | 0.011             | 0.009            | —                 | —                |
| 10 | 0.016               | 0.019              | —                   | —                  | —                 | —                | —                 | —                |
| 11 | 0.017               | 0.019              | —                   | —                  | —                 | —                | —                 | —                |
| 12 | 0.018               | 0.021              | —                   | —                  | 0.012             | 0.014            | —                 | —                |
| 13 | 0.021               | 0.023              | —                   | —                  | 0.015             | 0.016            | —                 | —                |
| 14 | —                   | —                  | —                   | —                  | 0.016             | 0.016            | —                 | —                |
| 15 | 0.023               | 0.025              | —                   | —                  | 0.016             | 0.016            | —                 | —                |
| 16 | 0.025               | 0.025              | —                   | —                  | 0.016             | 0.016            | —                 | —                |
| 17 | 0.026               | 0.029              | —                   | —                  | 0.017             | 0.019            | —                 | —                |
| 18 | 0.027               | 0.026              | —                   | —                  | —                 | —                | —                 | —                |
| 19 | 0.028               | 0.031              | —                   | —                  | 0.018             | 0.020            | —                 | —                |
| 20 | —                   | —                  | —                   | —                  | 0.019             | 0.020            | —                 | —                |
| 21 | 0.029               | 0.031              | —                   | —                  | —                 | —                | —                 | —                |
| 22 | 0.030               | 0.032              | —                   | —                  | 0.019             | 0.020            | —                 | —                |
| 23 | 0.030               | 0.031              | —                   | —                  | 0.019             | 0.020            | —                 | —                |
| 24 | —                   | —                  | —                   | —                  | 0.020             | 0.021            | —                 | —                |
| 25 | 0.031               | 0.031              | —                   | —                  | —                 | —                | —                 | —                |
| 26 | 0.031               | 0.032              | —                   | —                  | —                 | —                | —                 | —                |
| 27 | 0.033               | 0.035              | —                   | —                  | —                 | —                | —                 | —                |
| 28 | 0.033               | 0.033              | —                   | —                  | —                 | —                | —                 | —                |
| 29 | 0.033               | 0.036              | —                   | —                  | —                 | —                | —                 | —                |
| 30 | 0.035               | 0.036              | —                   | —                  | —                 | —                | —                 | —                |
| 31 | 0.035               | 0.040              | —                   | —                  | —                 | —                | —                 | —                |
| 32 | 0.036               | 0.036              | —                   | —                  | —                 | —                | —                 | —                |
| 33 | 0.037               | 0.043              | —                   | —                  | —                 | —                | —                 | —                |
| 34 | —                   | —                  | —                   | —                  | 0.020             | 0.024            | —                 | —                |
| 35 | —                   | —                  | —                   | —                  | 0.020             | 0.028            | —                 | —                |
| 36 | 0.037               | 0.060              | —                   | —                  | —                 | —                | —                 | —                |
| 37 | 0.039               | 0.069              | 0.084               | 0.114              | 0.021             | 0.031            | 0.043             | 0.054            |
| 38 | 0.045               | 0.076              | 0.088               | 0.118              | 0.024             | 0.031            | 0.046             | 0.053            |
| 39 | 0.062               | 0.054              | 0.101               | 0.092              | 0.033             | 0.028            | 0.052             | 0.047            |
| 40 | 0.084               | 0.074              | 0.116               | 0.106              | 0.038             | 0.029            | 0.053             | 0.045            |
| 41 | —                   | —                  | —                   | —                  | 0.101             | 0.209            | 0.069             | 0.179            |
| 42 | 0.246               | 0.446              | 0.248               | 0.447              | 0.118             | 0.170            | 0.077             | 0.130            |
| 43 | 0.596               | 0.560              | 0.598               | 0.562              | 0.325             | 0.342            | 0.298             | 0.313            |
| 44 | 0.321               | 0.294              | 0.589               | 0.589              | 0.208             | 0.166            | 0.337             | 0.309            |
| 45 | 0.184               | 0.208              | 0.323               | 0.347              | 0.070             | 0.086            | 0.139             | 0.155            |

Table C: Stability values for the Pareto optimal configurations in Table A. The ID column references Table A. “—” means that the configuration is not Pareto optimal for the corresponding stability measure.

| ID | 1 - SN<br>(train) | 1 - SN<br>(test) | 1 - SO<br>(train) | 1 - SO<br>(test) | 1 - SS<br>(train) | 1 - SS<br>(test) | 1 - SZ<br>(train) | 1 - SZ<br>(test) |
|----|-------------------|------------------|-------------------|------------------|-------------------|------------------|-------------------|------------------|
| 1  | 0.000             | 0.000            | 0.000             | 0.000            | 0.011             | 0.800            | 0.000             | 0.000            |
| 2  | 0.000             | 0.001            | 0.001             | 0.001            | —                 | —                | 0.002             | 0.003            |
| 3  | 0.002             | 0.002            | 0.005             | 0.004            | —                 | —                | 0.009             | 0.007            |
| 4  | 0.002             | 0.003            | 0.005             | 0.007            | —                 | —                | 0.010             | 0.014            |
| 5  | 0.003             | 0.004            | 0.007             | 0.009            | —                 | —                | 0.014             | 0.016            |
| 6  | 0.003             | 0.004            | 0.007             | 0.010            | —                 | —                | 0.014             | 0.018            |
| 7  | 0.004             | 0.004            | 0.008             | 0.009            | —                 | —                | 0.016             | 0.017            |
| 8  | 0.004             | 0.004            | 0.009             | 0.009            | —                 | —                | 0.017             | 0.018            |
| 9  | 0.005             | 0.004            | 0.011             | 0.009            | —                 | —                | 0.021             | 0.017            |
| 10 | —                 | —                | —                 | —                | —                 | —                | —                 | —                |
| 11 | 0.006             | 0.006            | —                 | —                | —                 | —                | —                 | —                |
| 12 | 0.006             | 0.007            | 0.012             | 0.014            | —                 | —                | 0.022             | 0.026            |
| 13 | 0.007             | 0.008            | 0.015             | 0.016            | —                 | —                | 0.027             | 0.030            |
| 14 | —                 | —                | 0.016             | 0.016            | —                 | —                | 0.029             | 0.030            |
| 15 | 0.007             | 0.008            | 0.016             | 0.016            | —                 | —                | 0.029             | 0.030            |
| 16 | 0.008             | 0.008            | 0.016             | 0.016            | —                 | —                | 0.031             | 0.030            |
| 17 | 0.008             | 0.009            | 0.017             | 0.019            | —                 | —                | 0.032             | 0.036            |
| 18 | —                 | —                | —                 | —                | —                 | —                | —                 | —                |
| 19 | 0.009             | 0.010            | 0.018             | 0.020            | —                 | —                | 0.033             | 0.037            |
| 20 | 0.009             | 0.010            | 0.019             | 0.020            | —                 | —                | —                 | —                |
| 21 | —                 | —                | —                 | —                | —                 | —                | —                 | —                |
| 22 | 0.009             | 0.010            | 0.019             | 0.020            | —                 | —                | —                 | —                |
| 23 | 0.009             | 0.010            | 0.019             | 0.020            | —                 | —                | —                 | —                |
| 24 | 0.010             | 0.010            | 0.020             | 0.021            | —                 | —                | —                 | —                |
| 25 | 0.010             | 0.010            | —                 | —                | —                 | —                | —                 | —                |
| 26 | 0.010             | 0.010            | —                 | —                | —                 | —                | —                 | —                |
| 27 | 0.010             | 0.011            | —                 | —                | —                 | —                | —                 | —                |
| 28 | —                 | —                | —                 | —                | —                 | —                | —                 | —                |
| 29 | —                 | —                | —                 | —                | —                 | —                | —                 | —                |
| 30 | —                 | —                | —                 | —                | —                 | —                | —                 | —                |
| 31 | —                 | —                | —                 | —                | —                 | —                | —                 | —                |
| 32 | —                 | —                | —                 | —                | —                 | —                | —                 | —                |
| 33 | —                 | —                | —                 | —                | —                 | —                | —                 | —                |
| 34 | 0.010             | 0.013            | 0.020             | 0.024            | 0.020             | 0.024            | —                 | —                |
| 35 | —                 | —                | 0.020             | 0.028            | 0.020             | 0.028            | —                 | —                |
| 36 | —                 | —                | —                 | —                | —                 | —                | —                 | —                |
| 37 | 0.011             | 0.017            | 0.021             | 0.031            | 0.021             | 0.031            | 0.034             | 0.052            |
| 38 | 0.013             | 0.018            | 0.024             | 0.031            | 0.024             | 0.031            | 0.039             | 0.050            |
| 39 | 0.017             | 0.015            | 0.033             | 0.028            | 0.033             | 0.028            | 0.050             | 0.046            |
| 40 | 0.021             | 0.017            | 0.038             | 0.029            | 0.038             | 0.029            | 0.056             | 0.044            |
| 41 | 0.066             | 0.129            | 0.100             | 0.208            | 0.085             | 0.204            | 0.145             | 0.281            |
| 42 | 0.068             | 0.125            | 0.117             | 0.169            | 0.102             | 0.149            | 0.175             | 0.249            |
| 43 | 0.233             | 0.234            | 0.324             | 0.341            | 0.308             | 0.343            | 0.387             | 0.382            |
| 44 | 0.116             | 0.095            | 0.208             | 0.166            | 0.221             | 0.179            | 0.324             | 0.268            |
| 45 | 0.044             | 0.053            | 0.070             | 0.086            | 0.070             | 0.086            | 0.118             | 0.142            |

Table D: Stability values for the Pareto optimal configurations in Table A. The ID column references Table A. “—” means that the configuration is not Pareto optimal for the corresponding stability measure.

# AP\_Colon\_Kidney

| ID  | Classifier   | Parameters            | Filter   | n.feats | Error<br>(train) | Error<br>(test) | Size<br>(train) | Size<br>(test) |
|-----|--------------|-----------------------|----------|---------|------------------|-----------------|-----------------|----------------|
| 46  | GLM Boosting | $m_{\text{stop}} = 1$ | AUC      | 7850    | 0.044            | 0.063           | 1.0             | 1.0            |
| 47  | GLM Boosting | $m_{\text{stop}} = 1$ | AUC      | 6132    | 0.026            | 0.041           | 1.0             | 1.0            |
| 48  | GLM Boosting | $m_{\text{stop}} = 1$ | AUC      | 5010    | 0.029            | 0.059           | 1.0             | 1.0            |
| 49  | GLM Boosting | $m_{\text{stop}} = 1$ | AUC      | 10398   | 0.036            | 0.066           | 1.0             | 1.0            |
| 50  | GLM Boosting | $m_{\text{stop}} = 1$ | AUC      | 4785    | 0.029            | 0.069           | 1.0             | 1.0            |
| 51  | GLM Boosting | $m_{\text{stop}} = 1$ | AUC      | 4796    | 0.044            | 0.040           | 1.0             | 1.0            |
| 52  | GLM Boosting | $m_{\text{stop}} = 1$ | AUC      | 6976    | 0.036            | 0.048           | 1.0             | 1.0            |
| 53  | GLM Boosting | $m_{\text{stop}} = 1$ | AUC      | 1419    | 0.018            | 0.055           | 1.0             | 1.0            |
| 54  | GLM Boosting | $m_{\text{stop}} = 1$ | AUC      | 150     | 0.037            | 0.051           | 1.0             | 1.0            |
| 55  | GLM Boosting | $m_{\text{stop}} = 1$ | AUC      | 4540    | 0.033            | 0.051           | 1.0             | 1.0            |
| 56  | GLM Boosting | $m_{\text{stop}} = 1$ | AUC      | 2917    | 0.029            | 0.047           | 1.0             | 1.0            |
| 57  | GLM Boosting | $m_{\text{stop}} = 1$ | AUC      | 2137    | 0.011            | 0.143           | 1.0             | 1.0            |
| 58  | GLM Boosting | $m_{\text{stop}} = 1$ | AUC      | 1136    | 0.026            | 0.040           | 1.0             | 1.0            |
| 59  | GLM Boosting | $m_{\text{stop}} = 1$ | AUC      | 5517    | 0.022            | 0.139           | 1.0             | 1.0            |
| 60  | GLM Boosting | $m_{\text{stop}} = 2$ | AUC      | 8921    | 0.029            | 0.044           | 1.0             | 1.1            |
| 61  | GLM Boosting | $m_{\text{stop}} = 1$ | AUC      | 5860    | 0.033            | 0.077           | 1.0             | 1.0            |
| 62  | GLM Boosting | $m_{\text{stop}} = 1$ | AUC      | 7749    | 0.037            | 0.048           | 1.0             | 1.0            |
| 63  | GLM Boosting | $m_{\text{stop}} = 1$ | AUC      | 9962    | 0.022            | 0.055           | 1.0             | 1.0            |
| 64  | GLM Boosting | $m_{\text{stop}} = 1$ | AUC      | 1520    | 0.040            | 0.062           | 1.0             | 1.0            |
| 65  | GLM Boosting | $m_{\text{stop}} = 1$ | AUC      | 5067    | 0.036            | 0.047           | 1.0             | 1.0            |
| 66  | GLM Boosting | $m_{\text{stop}} = 1$ | AUC      | 10106   | 0.040            | 0.029           | 1.0             | 1.0            |
| 67  | GLM Boosting | $m_{\text{stop}} = 1$ | AUC      | 8684    | 0.037            | 0.044           | 1.0             | 1.0            |
| 68  | GLM Boosting | $m_{\text{stop}} = 1$ | AUC      | 2535    | 0.037            | 0.074           | 1.0             | 1.0            |
| 69  | GLM Boosting | $m_{\text{stop}} = 1$ | AUC      | 6221    | 0.037            | 0.040           | 1.0             | 1.0            |
| 70  | GLM Boosting | $m_{\text{stop}} = 1$ | MRMR     | 5790    | 0.040            | 0.041           | 1.0             | 1.0            |
| 71  | GLM Boosting | $m_{\text{stop}} = 1$ | MRMR     | 6915    | 0.044            | 0.033           | 1.0             | 1.0            |
| 72  | GLM Boosting | $m_{\text{stop}} = 1$ | MRMR     | 7647    | 0.041            | 0.037           | 1.0             | 1.0            |
| 73  | GLM Boosting | $m_{\text{stop}} = 1$ | MRMR     | 5301    | 0.015            | 0.088           | 1.0             | 1.0            |
| 74  | GLM Boosting | $m_{\text{stop}} = 1$ | MRMR     | 7718    | 0.029            | 0.066           | 1.0             | 1.0            |
| 75  | GLM Boosting | $m_{\text{stop}} = 1$ | MRMR     | 7339    | 0.041            | 0.048           | 1.0             | 1.0            |
| 76  | GLM Boosting | $m_{\text{stop}} = 1$ | MRMR     | 10219   | 0.026            | 0.143           | 1.0             | 1.0            |
| 77  | GLM Boosting | $m_{\text{stop}} = 1$ | MRMR     | 7006    | 0.033            | 0.069           | 1.0             | 1.0            |
| 78  | GLM Boosting | $m_{\text{stop}} = 1$ | MRMR     | 4521    | 0.048            | 0.129           | 1.0             | 1.0            |
| 79  | GLM Boosting | $m_{\text{stop}} = 1$ | MRMR     | 8702    | 0.029            | 0.044           | 1.0             | 1.0            |
| 80  | GLM Boosting | $m_{\text{stop}} = 1$ | MRMR     | 475     | 0.037            | 0.150           | 1.0             | 1.0            |
| 81  | GLM Boosting | $m_{\text{stop}} = 1$ | MRMR     | 9426    | 0.033            | 0.058           | 1.0             | 1.0            |
| 82  | GLM Boosting | $m_{\text{stop}} = 1$ | MRMR     | 9081    | 0.029            | 0.041           | 1.0             | 1.0            |
| 83  | GLM Boosting | $m_{\text{stop}} = 1$ | MRMR     | 4783    | 0.029            | 0.110           | 1.0             | 1.0            |
| 84  | GLM Boosting | $m_{\text{stop}} = 1$ | Variance | 5344    | 0.040            | 0.051           | 1.0             | 1.0            |
| 85  | GLM Boosting | $m_{\text{stop}} = 1$ | Variance | 1702    | 0.029            | 0.033           | 1.0             | 1.0            |
| 86  | GLM Boosting | $m_{\text{stop}} = 1$ | Variance | 10831   | 0.040            | 0.026           | 1.0             | 1.0            |
| 87  | GLM Boosting | $m_{\text{stop}} = 1$ | Variance | 6173    | 0.047            | 0.048           | 1.0             | 1.0            |
| 88  | GLM Boosting | $m_{\text{stop}} = 1$ | Variance | 1717    | 0.029            | 0.069           | 1.0             | 1.0            |
| 89  | GLM Boosting | $m_{\text{stop}} = 1$ | Variance | 1578    | 0.040            | 0.051           | 1.0             | 1.0            |
| 90  | GLM Boosting | $m_{\text{stop}} = 1$ | Variance | 3102    | 0.026            | 0.088           | 1.0             | 1.0            |
| 91  | GLM Boosting | $m_{\text{stop}} = 1$ | Variance | 632     | 0.048            | 0.070           | 1.0             | 1.0            |
| 92  | GLM Boosting | $m_{\text{stop}} = 1$ | Variance | 2895    | 0.037            | 0.055           | 1.0             | 1.0            |
| 93  | GLM Boosting | $m_{\text{stop}} = 1$ | Variance | 5111    | 0.037            | 0.051           | 1.0             | 1.0            |
| 94  | GLM Boosting | $m_{\text{stop}} = 1$ | Variance | 2279    | 0.029            | 0.069           | 1.0             | 1.0            |
| 95  | GLM Boosting | $m_{\text{stop}} = 1$ | Variance | 1638    | 0.041            | 0.048           | 1.0             | 1.0            |
| 96  | GLM Boosting | $m_{\text{stop}} = 1$ | Variance | 2818    | 0.036            | 0.044           | 1.0             | 1.0            |
| 97  | GLM Boosting | $m_{\text{stop}} = 1$ | Variance | 4960    | 0.048            | 0.029           | 1.0             | 1.0            |
| 98  | GLM Boosting | $m_{\text{stop}} = 1$ | Variance | 9519    | 0.033            | 0.040           | 1.0             | 1.0            |
| 99  | GLM Boosting | $m_{\text{stop}} = 1$ | Variance | 8416    | 0.033            | 0.055           | 1.0             | 1.0            |
| 100 | GLM Boosting | $m_{\text{stop}} = 1$ | Variance | 2235    | 0.037            | 0.033           | 1.0             | 1.0            |
| 101 | GLM Boosting | $m_{\text{stop}} = 1$ | Variance | 7155    | 0.037            | 0.077           | 1.0             | 1.0            |
| 102 | GLM Boosting | $m_{\text{stop}} = 1$ | Variance | 10093   | 0.033            | 0.058           | 1.0             | 1.0            |

| ID  | Classifier       | Parameters                | Filter   | n.feats | Error<br>(train) | Error<br>(test) | Size<br>(train) | Size<br>(test) |
|-----|------------------|---------------------------|----------|---------|------------------|-----------------|-----------------|----------------|
| 103 | GLM Boosting     | $m_{\text{stop}} = 1$     | Variance | 5376    | 0.033            | 0.058           | 1.0             | 1.0            |
| 104 | GLM Boosting     | $m_{\text{stop}} = 1$     | Variance | 8198    | 0.026            | 0.062           | 1.0             | 1.0            |
| 105 | GLM Boosting     | $m_{\text{stop}} = 1$     | Variance | 5870    | 0.029            | 0.051           | 1.0             | 1.0            |
| 106 | GLM Boosting     | $m_{\text{stop}} = 1$     | Variance | 2274    | 0.033            | 0.077           | 1.0             | 1.0            |
| 107 | GLM Boosting     | $m_{\text{stop}} = 1$     | Variance | 3881    | 0.033            | 0.047           | 1.0             | 1.0            |
| 108 | GLM Boosting     | $m_{\text{stop}} = 1$     | Variance | 189     | 0.040            | 0.077           | 1.0             | 1.0            |
| 109 | GLM Boosting     | $m_{\text{stop}} = 1$     | Variance | 3235    | 0.036            | 0.047           | 1.0             | 1.0            |
| 110 | GLM Boosting     | $m_{\text{stop}} = 1$     | Variance | 241     | 0.048            | 0.069           | 1.0             | 1.0            |
| 111 | GLM Boosting     | $m_{\text{stop}} = 1$     | Variance | 3490    | 0.037            | 0.033           | 1.0             | 1.0            |
| 112 | GLM Boosting     | $m_{\text{stop}} = 2$     | Variance | 3765    | 0.033            | 0.029           | 1.0             | 2.0            |
| 113 | Lasso. Log. Reg. | $\lambda = 0.0001$        | Variance | 10812   | 0.000            | 0.026           | 10811.9         | 10812.0        |
| 114 | Lasso. Log. Reg. | $\lambda = 20.559$        | MRMR     | 9927    | 0.000            | 0.025           | 4546.2          | 4728.2         |
| 115 | GLM Boosting     | $m_{\text{stop}} = 28692$ | Variance | 972     | 0.000            | 0.026           | 51.0            | 55.4           |
| 116 | GLM Boosting     | $m_{\text{stop}} = 213$   | Variance | 1586    | 0.000            | 0.040           | 25.7            | 42.5           |

Table E: All Pareto optimal configurations for data set AP\_Colon\_Kidney (above the horizontal line) and accuracy optimal configurations (below the horizontal line). The ID column references Tables F, G, and H.

| ID | 1 - SJ<br>(train) | 1 - SJ<br>(test) | 1 - SC<br>(train) | 1 - SC<br>(test) | 1 - SD-1<br>(train) | 1 - SD-1<br>(test) | 1 - SD-10<br>(train) | 1 - SD-10<br>(test) |
|----|-------------------|------------------|-------------------|------------------|---------------------|--------------------|----------------------|---------------------|
| 46 | 0.000             | 0.467            | 0.000             | 0.467            | 0.000               | 0.500              | 0.001                | 0.501               |
| 47 | 0.000             | 0.000            | 0.000             | 0.000            | 0.000               | 0.000              | 0.001                | 0.001               |
| 48 | 0.000             | 0.200            | 0.000             | 0.200            | 0.000               | 0.500              | 0.001                | 0.501               |
| 49 | 0.000             | 0.356            | 0.000             | 0.356            | 0.000               | 0.500              | 0.001                | 0.501               |
| 50 | 0.000             | 0.511            | 0.000             | 0.511            | 0.000               | 0.667              | 0.001                | 0.668               |
| 51 | 0.000             | 0.200            | 0.000             | 0.200            | 0.000               | 0.500              | 0.001                | 0.501               |
| 52 | 0.000             | 0.467            | 0.000             | 0.467            | 0.000               | 0.500              | 0.001                | 0.501               |
| 53 | 0.000             | 0.200            | 0.000             | 0.200            | 0.000               | 0.500              | 0.001                | 0.501               |
| 54 | 0.000             | 0.200            | 0.000             | 0.200            | 0.000               | 0.500              | 0.001                | 0.501               |
| 55 | 0.000             | 0.200            | 0.000             | 0.200            | 0.000               | 0.500              | 0.001                | 0.501               |
| 56 | 0.000             | 0.000            | 0.000             | 0.000            | 0.000               | 0.000              | 0.001                | 0.001               |
| 57 | 0.000             | 0.511            | 0.000             | 0.511            | 0.000               | 0.667              | 0.001                | 0.668               |
| 58 | 0.000             | 0.000            | 0.000             | 0.000            | 0.000               | 0.000              | 0.001                | 0.001               |
| 59 | 0.000             | 0.000            | 0.000             | 0.000            | 0.000               | 0.000              | 0.001                | 0.001               |
| 60 | 0.000             | 0.100            | 0.000             | 0.059            | 0.000               | 0.450              | 0.001                | 0.451               |
| 61 | 0.000             | 0.622            | 0.000             | 0.622            | 0.000               | 0.667              | 0.001                | 0.668               |
| 62 | 0.000             | 0.356            | 0.000             | 0.356            | 0.000               | 0.500              | 0.001                | 0.501               |
| 63 | 0.000             | 0.533            | 0.000             | 0.533            | 0.000               | 0.500              | 0.001                | 0.501               |
| 64 | 0.000             | 0.556            | 0.000             | 0.556            | 0.000               | 0.500              | 0.001                | 0.501               |
| 65 | 0.000             | 0.000            | 0.000             | 0.000            | 0.000               | 0.000              | 0.001                | 0.001               |
| 66 | 0.000             | 0.000            | 0.000             | 0.000            | 0.000               | 0.000              | 0.001                | 0.001               |
| 67 | 0.000             | 0.200            | 0.000             | 0.200            | 0.000               | 0.500              | 0.001                | 0.501               |
| 68 | 0.000             | 0.511            | 0.000             | 0.511            | 0.000               | 0.667              | 0.001                | 0.668               |
| 69 | 0.000             | 0.356            | 0.000             | 0.356            | 0.000               | 0.500              | 0.001                | 0.501               |
| 70 | 0.000             | 0.200            | 0.000             | 0.200            | 0.000               | 0.500              | 0.001                | 0.501               |
| 71 | 0.000             | 0.689            | 0.000             | 0.689            | 0.000               | 0.667              | 0.001                | 0.668               |
| 72 | 0.000             | 0.356            | 0.000             | 0.356            | 0.000               | 0.500              | 0.001                | 0.501               |
| 73 | 0.000             | 0.356            | 0.000             | 0.356            | 0.000               | 0.500              | 0.001                | 0.501               |
| 74 | 0.000             | 0.356            | 0.000             | 0.356            | 0.000               | 0.500              | 0.001                | 0.501               |
| 75 | 0.000             | 0.356            | 0.000             | 0.356            | 0.000               | 0.500              | 0.001                | 0.501               |
| 76 | 0.000             | 0.378            | 0.000             | 0.378            | 0.000               | 0.667              | 0.001                | 0.668               |
| 77 | 0.000             | 0.644            | 0.000             | 0.645            | 0.000               | 0.667              | 0.001                | 0.668               |
| 78 | 0.000             | 0.644            | 0.000             | 0.645            | 0.000               | 0.750              | 0.001                | 0.751               |
| 79 | 0.000             | 0.000            | 0.000             | 0.000            | 0.000               | 0.000              | 0.001                | 0.001               |
| 80 | 0.000             | 0.511            | 0.000             | 0.511            | 0.000               | 0.667              | 0.001                | 0.668               |
| 81 | 0.000             | 0.467            | 0.000             | 0.467            | 0.000               | 0.500              | 0.001                | 0.501               |
| 82 | 0.000             | 0.533            | 0.000             | 0.533            | 0.000               | 0.500              | 0.001                | 0.501               |
| 83 | 0.000             | 0.533            | 0.000             | 0.533            | 0.000               | 0.500              | 0.001                | 0.501               |
| 84 | 0.000             | 0.200            | 0.000             | 0.200            | 0.000               | 0.500              | 0.001                | 0.501               |

| ID  | 1 - SJ<br>(train) | 1 - SJ<br>(test) | 1 - SC<br>(train) | 1 - SC<br>(test) | 1 - SD-1<br>(train) | 1 - SD-1<br>(test) | 1 - SD-10<br>(train) | 1 - SD-10<br>(test) |
|-----|-------------------|------------------|-------------------|------------------|---------------------|--------------------|----------------------|---------------------|
| 85  | 0.000             | 0.000            | 0.000             | 0.000            | 0.000               | 0.000              | 0.001                | 0.001               |
| 86  | 0.000             | 0.000            | 0.000             | 0.000            | 0.000               | 0.000              | 0.001                | 0.001               |
| 87  | 0.000             | 0.000            | 0.000             | 0.000            | 0.000               | 0.000              | 0.001                | 0.001               |
| 88  | 0.000             | 0.467            | 0.000             | 0.467            | 0.000               | 0.500              | 0.001                | 0.501               |
| 89  | 0.000             | 0.356            | 0.000             | 0.356            | 0.000               | 0.500              | 0.001                | 0.501               |
| 90  | 0.000             | 0.600            | 0.000             | 0.600            | 0.000               | 0.667              | 0.001                | 0.668               |
| 91  | 0.000             | 0.000            | 0.000             | 0.000            | 0.000               | 0.000              | 0.001                | 0.001               |
| 92  | 0.000             | 0.000            | 0.000             | 0.000            | 0.000               | 0.000              | 0.001                | 0.001               |
| 93  | 0.000             | 0.200            | 0.000             | 0.200            | 0.000               | 0.500              | 0.001                | 0.501               |
| 94  | 0.000             | 0.533            | 0.000             | 0.533            | 0.000               | 0.500              | 0.001                | 0.501               |
| 95  | 0.000             | 0.356            | 0.000             | 0.356            | 0.000               | 0.500              | 0.001                | 0.501               |
| 96  | 0.000             | 0.533            | 0.000             | 0.533            | 0.000               | 0.500              | 0.001                | 0.501               |
| 97  | 0.000             | 0.000            | 0.000             | 0.000            | 0.000               | 0.000              | 0.001                | 0.001               |
| 98  | 0.000             | 0.000            | 0.000             | 0.000            | 0.000               | 0.000              | 0.001                | 0.001               |
| 99  | 0.000             | 0.200            | 0.000             | 0.200            | 0.000               | 0.500              | 0.001                | 0.501               |
| 100 | 0.000             | 0.000            | 0.000             | 0.000            | 0.000               | 0.000              | 0.001                | 0.001               |
| 101 | 0.000             | 0.622            | 0.000             | 0.622            | 0.000               | 0.667              | 0.001                | 0.668               |
| 102 | 0.000             | 0.556            | 0.000             | 0.556            | 0.000               | 0.500              | 0.001                | 0.501               |
| 103 | 0.000             | 0.467            | 0.000             | 0.467            | 0.000               | 0.500              | 0.001                | 0.501               |
| 104 | 0.000             | 0.200            | 0.000             | 0.200            | 0.000               | 0.500              | 0.001                | 0.501               |
| 105 | 0.000             | 0.200            | 0.000             | 0.200            | 0.000               | 0.500              | 0.001                | 0.501               |
| 106 | 0.000             | 0.622            | 0.000             | 0.622            | 0.000               | 0.667              | 0.001                | 0.668               |
| 107 | 0.000             | 0.000            | 0.000             | 0.000            | 0.000               | 0.000              | 0.001                | 0.001               |
| 108 | 0.000             | 0.000            | 0.000             | 0.000            | 0.000               | 0.000              | 0.001                | 0.001               |
| 109 | 0.000             | 0.000            | 0.000             | 0.000            | 0.000               | 0.000              | 0.001                | 0.001               |
| 110 | 0.000             | 0.000            | 0.000             | 0.000            | 0.000               | 0.000              | 0.001                | 0.001               |
| 111 | 0.000             | 0.000            | 0.000             | 0.000            | 0.000               | 0.000              | 0.001                | 0.001               |
| 112 | 0.000             | 0.000            | 0.000             | 0.000            | 0.000               | 0.000              | 0.001                | 0.002               |
| 113 | 0.004             | 0.004            | 0.188             | 0.168            | 0.993               | 0.991              | 1.000                | 1.000               |
| 114 | 0.563             | 0.557            | 0.671             | 0.680            | 0.934               | 0.944              | 1.000                | 1.000               |
| 115 | 0.426             | 0.553            | 0.274             | 0.387            | 0.468               | 0.601              | 0.510                | 0.646               |
| 116 | 0.440             | 0.519            | 0.286             | 0.355            | 0.543               | 0.566              | 0.565                | 0.602               |

Table F: Stability values for the Pareto optimal configurations in Table E. The ID column references Table E. “—” means that the configuration is not Pareto optimal for the corresponding stability measure.

| ID | 1 - SD-0<br>(train) | 1 - SD-0<br>(test) | 1 - SD-2<br>(train) | 1 - SD-2<br>(test) | 1 - SD<br>(train) | 1 - SD<br>(test) | 1 - SL<br>(train) | 1 - SL<br>(test) |
|----|---------------------|--------------------|---------------------|--------------------|-------------------|------------------|-------------------|------------------|
| 46 | 0.000               | 0.500              | 0.000               | 0.500              | 0.000             | 0.467            | 0.000             | 0.467            |
| 47 | 0.000               | 0.000              | 0.000               | 0.000              | 0.000             | 0.000            | 0.000             | 0.000            |
| 48 | 0.000               | 0.500              | 0.000               | 0.500              | 0.000             | 0.200            | 0.000             | 0.200            |
| 49 | 0.000               | 0.500              | 0.000               | 0.500              | 0.000             | 0.356            | 0.000             | 0.356            |
| 50 | 0.000               | 0.667              | 0.000               | 0.667              | 0.000             | 0.511            | 0.000             | 0.511            |
| 51 | 0.000               | 0.500              | 0.000               | 0.500              | 0.000             | 0.200            | 0.000             | 0.200            |
| 52 | 0.000               | 0.500              | 0.000               | 0.500              | 0.000             | 0.467            | 0.000             | 0.467            |
| 53 | 0.000               | 0.500              | 0.000               | 0.500              | 0.000             | 0.200            | 0.000             | 0.200            |
| 54 | 0.000               | 0.500              | 0.000               | 0.500              | 0.000             | 0.200            | 0.000             | 0.200            |
| 55 | 0.000               | 0.500              | 0.000               | 0.500              | 0.000             | 0.200            | 0.000             | 0.200            |
| 56 | 0.000               | 0.000              | 0.000               | 0.000              | 0.000             | 0.000            | 0.000             | 0.000            |
| 57 | 0.000               | 0.667              | 0.000               | 0.667              | 0.000             | 0.511            | 0.000             | 0.511            |
| 58 | 0.000               | 0.000              | 0.000               | 0.000              | 0.000             | 0.000            | 0.000             | 0.000            |
| 59 | 0.000               | 0.000              | 0.000               | 0.000              | 0.000             | 0.000            | 0.000             | 0.000            |
| 60 | 0.000               | 0.450              | 0.000               | 0.450              | 0.000             | 0.067            | 0.000             | 0.000            |
| 61 | 0.000               | 0.667              | 0.000               | 0.667              | 0.000             | 0.622            | 0.000             | 0.622            |
| 62 | 0.000               | 0.500              | 0.000               | 0.500              | 0.000             | 0.356            | 0.000             | 0.356            |
| 63 | 0.000               | 0.500              | 0.000               | 0.500              | 0.000             | 0.533            | 0.000             | 0.533            |
| 64 | 0.000               | 0.500              | 0.000               | 0.500              | 0.000             | 0.556            | 0.000             | 0.556            |
| 65 | 0.000               | 0.000              | 0.000               | 0.000              | 0.000             | 0.000            | 0.000             | 0.000            |
| 66 | 0.000               | 0.000              | 0.000               | 0.000              | 0.000             | 0.000            | 0.000             | 0.000            |



| ID  | 1 - SD-0<br>(train) | 1 - SD-0<br>(test) | 1 - SD-2<br>(train) | 1 - SD-2<br>(test) | 1 - SD<br>(train) | 1 - SD<br>(test) | 1 - SL<br>(train) | 1 - SL<br>(test) |
|-----|---------------------|--------------------|---------------------|--------------------|-------------------|------------------|-------------------|------------------|
| 67  | 0.000               | 0.500              | 0.000               | 0.500              | 0.000             | 0.200            | 0.000             | 0.200            |
| 68  | 0.000               | 0.667              | 0.000               | 0.667              | 0.000             | 0.511            | 0.000             | 0.511            |
| 69  | 0.000               | 0.500              | 0.000               | 0.500              | 0.000             | 0.356            | 0.000             | 0.356            |
| 70  | 0.000               | 0.500              | 0.000               | 0.500              | 0.000             | 0.200            | 0.000             | 0.200            |
| 71  | 0.000               | 0.667              | 0.000               | 0.667              | 0.000             | 0.689            | 0.000             | 0.689            |
| 72  | 0.000               | 0.500              | 0.000               | 0.500              | 0.000             | 0.356            | 0.000             | 0.356            |
| 73  | 0.000               | 0.500              | 0.000               | 0.500              | 0.000             | 0.356            | 0.000             | 0.356            |
| 74  | 0.000               | 0.500              | 0.000               | 0.500              | 0.000             | 0.356            | 0.000             | 0.356            |
| 75  | 0.000               | 0.500              | 0.000               | 0.500              | 0.000             | 0.356            | 0.000             | 0.356            |
| 76  | 0.000               | 0.667              | 0.000               | 0.667              | 0.000             | 0.378            | 0.000             | 0.378            |
| 77  | 0.000               | 0.667              | 0.000               | 0.667              | 0.000             | 0.644            | 0.000             | 0.645            |
| 78  | 0.000               | 0.750              | 0.000               | 0.750              | 0.000             | 0.644            | 0.000             | 0.645            |
| 79  | 0.000               | 0.000              | 0.000               | 0.000              | 0.000             | 0.000            | 0.000             | 0.000            |
| 80  | 0.000               | 0.667              | 0.000               | 0.667              | 0.000             | 0.511            | 0.000             | 0.511            |
| 81  | 0.000               | 0.500              | 0.000               | 0.500              | 0.000             | 0.467            | 0.000             | 0.467            |
| 82  | 0.000               | 0.500              | 0.000               | 0.500              | 0.000             | 0.533            | 0.000             | 0.533            |
| 83  | 0.000               | 0.500              | 0.000               | 0.500              | 0.000             | 0.533            | 0.000             | 0.533            |
| 84  | 0.000               | 0.500              | 0.000               | 0.500              | 0.000             | 0.200            | 0.000             | 0.200            |
| 85  | 0.000               | 0.000              | 0.000               | 0.000              | 0.000             | 0.000            | 0.000             | 0.000            |
| 86  | 0.000               | 0.000              | 0.000               | 0.000              | 0.000             | 0.000            | 0.000             | 0.000            |
| 87  | 0.000               | 0.000              | 0.000               | 0.000              | 0.000             | 0.000            | 0.000             | 0.000            |
| 88  | 0.000               | 0.500              | 0.000               | 0.500              | 0.000             | 0.467            | 0.000             | 0.467            |
| 89  | 0.000               | 0.500              | 0.000               | 0.500              | 0.000             | 0.356            | 0.000             | 0.356            |
| 90  | 0.000               | 0.667              | 0.000               | 0.667              | 0.000             | 0.600            | 0.000             | 0.600            |
| 91  | 0.000               | 0.000              | 0.000               | 0.000              | 0.000             | 0.000            | 0.000             | 0.000            |
| 92  | 0.000               | 0.000              | 0.000               | 0.000              | 0.000             | 0.000            | 0.000             | 0.000            |
| 93  | 0.000               | 0.500              | 0.000               | 0.500              | 0.000             | 0.200            | 0.000             | 0.200            |
| 94  | 0.000               | 0.500              | 0.000               | 0.500              | 0.000             | 0.533            | 0.000             | 0.533            |
| 95  | 0.000               | 0.500              | 0.000               | 0.500              | 0.000             | 0.356            | 0.000             | 0.356            |
| 96  | 0.000               | 0.500              | 0.000               | 0.500              | 0.000             | 0.533            | 0.000             | 0.533            |
| 97  | 0.000               | 0.000              | 0.000               | 0.000              | 0.000             | 0.000            | 0.000             | 0.000            |
| 98  | 0.000               | 0.000              | 0.000               | 0.000              | 0.000             | 0.000            | 0.000             | 0.000            |
| 99  | 0.000               | 0.500              | 0.000               | 0.500              | 0.000             | 0.200            | 0.000             | 0.200            |
| 100 | 0.000               | 0.000              | 0.000               | 0.000              | 0.000             | 0.000            | 0.000             | 0.000            |
| 101 | 0.000               | 0.667              | 0.000               | 0.667              | 0.000             | 0.622            | 0.000             | 0.622            |
| 102 | 0.000               | 0.500              | 0.000               | 0.500              | 0.000             | 0.556            | 0.000             | 0.556            |
| 103 | 0.000               | 0.500              | 0.000               | 0.500              | 0.000             | 0.467            | 0.000             | 0.467            |
| 104 | 0.000               | 0.500              | 0.000               | 0.500              | 0.000             | 0.200            | 0.000             | 0.200            |
| 105 | 0.000               | 0.500              | 0.000               | 0.500              | 0.000             | 0.200            | 0.000             | 0.200            |
| 106 | 0.000               | 0.667              | 0.000               | 0.667              | 0.000             | 0.622            | 0.000             | 0.622            |
| 107 | 0.000               | 0.000              | 0.000               | 0.000              | 0.000             | 0.000            | 0.000             | 0.000            |
| 108 | 0.000               | 0.000              | 0.000               | 0.000              | 0.000             | 0.000            | 0.000             | 0.000            |
| 109 | 0.000               | 0.000              | 0.000               | 0.000              | 0.000             | 0.000            | 0.000             | 0.000            |
| 110 | 0.000               | 0.000              | 0.000               | 0.000              | 0.000             | 0.000            | 0.000             | 0.000            |
| 111 | 0.000               | 0.000              | 0.000               | 0.000              | 0.000             | 0.000            | 0.000             | 0.000            |
| 112 | 0.000               | 0.000              | 0.000               | 0.000              | 0.000             | 0.000            | 0.000             | 0.000            |
| 113 | 0.004               | 0.003              | 1.000               | 1.000              | 0.002             | 0.002            | 0.196             | 0.177            |
| 114 | 0.520               | 0.508              | 1.000               | 1.000              | 0.392             | 0.386            | 0.805             | 0.816            |
| 115 | 0.463               | 0.596              | 0.472               | 0.606              | 0.274             | 0.387            | 0.242             | 0.352            |
| 116 | 0.541               | 0.562              | 0.546               | 0.570              | 0.287             | 0.355            | 0.250             | 0.321            |

Table G: Stability values for the Pareto optimal configurations in Table E. The ID column references Table E. “—” means that the configuration is not Pareto optimal for the corresponding stability measure.

| ID  | 1 - SN<br>(train) | 1 - SN<br>(test) | 1 - SO<br>(train) | 1 - SO<br>(test) | 1 - SS<br>(train) | 1 - SS<br>(test) | 1 - SZ<br>(train) | 1 - SZ<br>(test) |
|-----|-------------------|------------------|-------------------|------------------|-------------------|------------------|-------------------|------------------|
| 46  | 0.000             | 0.265            | 0.000             | 0.467            | 0.000             | 0.467            | 0.000             | 0.467            |
| 47  | 0.000             | 0.000            | 0.000             | 0.000            | 0.000             | 0.000            | 0.000             | 0.000            |
| 48  | 0.000             | 0.141            | 0.000             | 0.200            | 0.000             | 0.200            | 0.000             | 0.200            |
| 49  | 0.000             | 0.217            | 0.000             | 0.356            | 0.000             | 0.356            | 0.000             | 0.356            |
| 50  | 0.000             | 0.348            | 0.000             | 0.511            | 0.000             | 0.511            | 0.000             | 0.511            |
| 51  | 0.000             | 0.141            | 0.000             | 0.200            | 0.000             | 0.200            | 0.000             | 0.200            |
| 52  | 0.000             | 0.265            | 0.000             | 0.467            | 0.000             | 0.467            | 0.000             | 0.467            |
| 53  | 0.000             | 0.141            | 0.000             | 0.200            | 0.000             | 0.200            | 0.000             | 0.200            |
| 54  | 0.000             | 0.141            | 0.000             | 0.200            | 0.000             | 0.200            | 0.000             | 0.200            |
| 55  | 0.000             | 0.141            | 0.000             | 0.200            | 0.000             | 0.200            | 0.000             | 0.200            |
| 56  | 0.000             | 0.000            | 0.000             | 0.000            | 0.000             | 0.000            | 0.000             | 0.000            |
| 57  | 0.000             | 0.348            | 0.000             | 0.511            | 0.000             | 0.511            | 0.000             | 0.511            |
| 58  | 0.000             | 0.000            | 0.000             | 0.000            | 0.000             | 0.000            | 0.000             | 0.000            |
| 59  | 0.000             | 0.000            | 0.000             | 0.000            | 0.000             | 0.000            | 0.000             | 0.000            |
| 60  | 0.000             | 0.091            | 0.000             | 0.059            | 0.000             | 0.000            | 0.000             | 0.100            |
| 61  | 0.000             | 0.413            | 0.000             | 0.622            | 0.000             | 0.622            | 0.000             | 0.622            |
| 62  | 0.000             | 0.217            | 0.000             | 0.356            | 0.000             | 0.356            | 0.000             | 0.356            |
| 63  | 0.000             | 0.292            | 0.000             | 0.533            | 0.000             | 0.533            | 0.000             | 0.533            |
| 64  | 0.000             | 0.301            | 0.000             | 0.556            | 0.000             | 0.556            | 0.000             | 0.556            |
| 65  | 0.000             | 0.000            | 0.000             | 0.000            | 0.000             | 0.000            | 0.000             | 0.000            |
| 66  | 0.000             | 0.000            | 0.000             | 0.000            | 0.000             | 0.000            | 0.000             | 0.000            |
| 67  | 0.000             | 0.141            | 0.000             | 0.200            | 0.000             | 0.200            | 0.000             | 0.200            |
| 68  | 0.000             | 0.348            | 0.000             | 0.511            | 0.000             | 0.511            | 0.000             | 0.511            |
| 69  | 0.000             | 0.217            | 0.000             | 0.356            | 0.000             | 0.356            | 0.000             | 0.356            |
| 70  | 0.000             | 0.141            | 0.000             | 0.200            | 0.000             | 0.200            | 0.000             | 0.200            |
| 71  | 0.000             | 0.447            | 0.000             | 0.689            | 0.000             | 0.689            | 0.000             | 0.689            |
| 72  | 0.000             | 0.217            | 0.000             | 0.356            | 0.000             | 0.356            | 0.000             | 0.356            |
| 73  | 0.000             | 0.217            | 0.000             | 0.356            | 0.000             | 0.356            | 0.000             | 0.356            |
| 74  | 0.000             | 0.217            | 0.000             | 0.356            | 0.000             | 0.356            | 0.000             | 0.356            |
| 75  | 0.000             | 0.217            | 0.000             | 0.356            | 0.000             | 0.356            | 0.000             | 0.356            |
| 76  | 0.000             | 0.278            | 0.000             | 0.378            | 0.000             | 0.378            | 0.000             | 0.378            |
| 77  | 0.000             | 0.410            | 0.000             | 0.644            | 0.000             | 0.644            | 0.000             | 0.644            |
| 78  | 0.000             | 0.473            | 0.000             | 0.644            | 0.000             | 0.644            | 0.000             | 0.644            |
| 79  | 0.000             | 0.000            | 0.000             | 0.000            | 0.000             | 0.000            | 0.000             | 0.000            |
| 80  | 0.000             | 0.348            | 0.000             | 0.511            | 0.000             | 0.511            | 0.000             | 0.511            |
| 81  | 0.000             | 0.265            | 0.000             | 0.467            | 0.000             | 0.467            | 0.000             | 0.467            |
| 82  | 0.000             | 0.292            | 0.000             | 0.533            | 0.000             | 0.533            | 0.000             | 0.533            |
| 83  | 0.000             | 0.292            | 0.000             | 0.533            | 0.000             | 0.533            | 0.000             | 0.533            |
| 84  | 0.000             | 0.141            | 0.000             | 0.200            | 0.000             | 0.200            | 0.000             | 0.200            |
| 85  | 0.000             | 0.000            | 0.000             | 0.000            | 0.000             | 0.000            | 0.000             | 0.000            |
| 86  | 0.000             | 0.000            | 0.000             | 0.000            | 0.000             | 0.000            | 0.000             | 0.000            |
| 87  | 0.000             | 0.000            | 0.000             | 0.000            | 0.000             | 0.000            | 0.000             | 0.000            |
| 88  | 0.000             | 0.265            | 0.000             | 0.467            | 0.000             | 0.467            | 0.000             | 0.467            |
| 89  | 0.000             | 0.217            | 0.000             | 0.356            | 0.000             | 0.356            | 0.000             | 0.356            |
| 90  | 0.000             | 0.390            | 0.000             | 0.600            | 0.000             | 0.600            | 0.000             | 0.600            |
| 91  | 0.000             | 0.000            | 0.000             | 0.000            | 0.000             | 0.000            | 0.000             | 0.000            |
| 92  | 0.000             | 0.000            | 0.000             | 0.000            | 0.000             | 0.000            | 0.000             | 0.000            |
| 93  | 0.000             | 0.141            | 0.000             | 0.200            | 0.000             | 0.200            | 0.000             | 0.200            |
| 94  | 0.000             | 0.292            | 0.000             | 0.533            | 0.000             | 0.533            | 0.000             | 0.533            |
| 95  | 0.000             | 0.217            | 0.000             | 0.356            | 0.000             | 0.356            | 0.000             | 0.356            |
| 96  | 0.000             | 0.292            | 0.000             | 0.533            | 0.000             | 0.533            | 0.000             | 0.533            |
| 97  | 0.000             | 0.000            | 0.000             | 0.000            | 0.000             | 0.000            | 0.000             | 0.000            |
| 98  | 0.000             | 0.000            | 0.000             | 0.000            | 0.000             | 0.000            | 0.000             | 0.000            |
| 99  | 0.000             | 0.141            | 0.000             | 0.200            | 0.000             | 0.200            | 0.000             | 0.200            |
| 100 | 0.000             | 0.000            | 0.000             | 0.000            | 0.000             | 0.000            | 0.000             | 0.000            |
| 101 | 0.000             | 0.413            | 0.000             | 0.622            | 0.000             | 0.622            | 0.000             | 0.622            |
| 102 | 0.000             | 0.301            | 0.000             | 0.556            | 0.000             | 0.556            | 0.000             | 0.556            |
| 103 | 0.000             | 0.265            | 0.000             | 0.467            | 0.000             | 0.467            | 0.000             | 0.467            |
| 104 | 0.000             | 0.141            | 0.000             | 0.200            | 0.000             | 0.200            | 0.000             | 0.200            |

| ID  | 1 - SN<br>(train) | 1 - SN<br>(test) | 1 - SO<br>(train) | 1 - SO<br>(test) | 1 - SS<br>(train) | 1 - SS<br>(test) | 1 - SZ<br>(train) | 1 - SZ<br>(test) |
|-----|-------------------|------------------|-------------------|------------------|-------------------|------------------|-------------------|------------------|
| 105 | 0.000             | 0.141            | 0.000             | 0.200            | 0.000             | 0.200            | 0.000             | 0.200            |
| 106 | 0.000             | 0.413            | 0.000             | 0.622            | 0.000             | 0.622            | 0.000             | 0.622            |
| 107 | 0.000             | 0.000            | 0.000             | 0.000            | 0.000             | 0.000            | 0.000             | 0.000            |
| 108 | 0.000             | 0.000            | 0.000             | 0.000            | 0.000             | 0.000            | 0.000             | 0.000            |
| 109 | 0.000             | 0.000            | 0.000             | 0.000            | 0.000             | 0.000            | 0.000             | 0.000            |
| 110 | 0.000             | 0.000            | 0.000             | 0.000            | 0.000             | 0.000            | 0.000             | 0.000            |
| 111 | 0.000             | 0.000            | 0.000             | 0.000            | 0.000             | 0.000            | 0.000             | 0.000            |
| 112 | 0.000             | 0.000            | 0.000             | 0.000            | 0.000             | 0.000            | 0.000             | 0.000            |
| 113 | 0.001             | 0.001            | 0.002             | 0.002            | 0.185             | 0.166            | 0.004             | 0.004            |
| 114 | 0.239             | 0.233            | 0.392             | 0.386            | 0.607             | 0.618            | 0.506             | 0.504            |
| 115 | 0.171             | 0.262            | 0.272             | 0.385            | 0.272             | 0.382            | 0.350             | 0.481            |
| 116 | 0.200             | 0.231            | 0.285             | 0.354            | 0.280             | 0.347            | 0.347             | 0.435            |

Table H: Stability values for the Pareto optimal configurations in Table E. The ID column references Table E. “—” means that the configuration is not Pareto optimal for the corresponding stability measure.

## Stomach

| ID  | Classifier       | Parameters              | Filter   | n.feats | Error<br>(train) | Error<br>(test) | Size<br>(train) | Size<br>(test) |
|-----|------------------|-------------------------|----------|---------|------------------|-----------------|-----------------|----------------|
| 117 | Lasso. Log. Reg. | $\lambda = 0.0001$      | AUC      | 2730    | 0.215            | 0.466           | 2726.9          | 2726.1         |
| 118 | Lasso. Log. Reg. | $\lambda = 0.00004$     | MRMR     | 1972    | 0.219            | 0.491           | 1971.1          | 1970.2         |
| 119 | GLM Boosting     | $m_{\text{stop}} = 153$ | MRMR     | 461     | 0.193            | 0.360           | 35.5            | 46.8           |
| 120 | GLM Boosting     | $m_{\text{stop}} = 17$  | AUC      | 8330    | 0.221            | 0.494           | 11.8            | 14.0           |
| 121 | GLM Boosting     | $m_{\text{stop}} = 228$ | Variance | 8526    | 0.175            | 0.461           | 48.7            | 60.9           |

Table I: All Pareto optimal configurations for data set Stomach (above the horizontal line) and accuracy optimal configurations (below the horizontal line). The ID column references Tables J, K, and L.

| ID  | 1 - SJ<br>(train) | 1 - SJ<br>(test) | 1 - SC<br>(train) | 1 - SC<br>(test) | 1 - SD-1<br>(train) | 1 - SD-1<br>(test) | 1 - SD-10<br>(train) | 1 - SD-10<br>(test) |
|-----|-------------------|------------------|-------------------|------------------|---------------------|--------------------|----------------------|---------------------|
| 117 | 0.352             | 0.441            | —                 | —                | —                   | —                  | —                    | —                   |
| 118 | 0.368             | 0.457            | 0.281             | 0.369            | 0.609               | 0.694              | —                    | —                   |
| 119 | 0.594             | 0.747            | 0.426             | 0.601            | 0.656               | 0.749              | —                    | —                   |
| 120 | 0.596             | 0.864            | 0.428             | 0.767            | 0.673               | 0.815              | 0.684                | 0.827               |
| 121 | 0.664             | 0.739            | 0.502             | 0.591            | 0.708               | 0.739              | 0.752                | 0.794               |

Table J: Stability values for the Pareto optimal configurations in Table I. The ID column references Table I. “—” means that the configuration is not Pareto optimal for the corresponding stability measure.

| ID  | 1 - SD-0<br>(train) | 1 - SD-0<br>(test) | 1 - SD-2<br>(train) | 1 - SD-2<br>(test) | 1 - SD<br>(train) | 1 - SD<br>(test) | 1 - SL<br>(train) | 1 - SL<br>(test) |
|-----|---------------------|--------------------|---------------------|--------------------|-------------------|------------------|-------------------|------------------|
| 117 | 0.401               | 0.483              | —                   | —                  | 0.215             | 0.284            | —                 | —                |
| 118 | 0.412               | 0.497              | —                   | —                  | 0.226             | 0.296            | —                 | —                |
| 119 | 0.652               | 0.744              | 0.659               | 0.754              | 0.425             | 0.599            | —                 | —                |
| 120 | 0.672               | 0.813              | 0.675               | 0.816              | 0.430             | 0.766            | 0.379             | 0.755            |
| 121 | 0.703               | 0.733              | 0.713               | 0.745              | 0.500             | 0.588            | 0.482             | 0.577            |

Table K: Stability values for the Pareto optimal configurations in Table I. The ID column references Table I. “—” means that the configuration is not Pareto optimal for the corresponding stability measure.

| ID  | 1 - SN<br>(train) | 1 - SN<br>(test) | 1 - SO<br>(train) | 1 - SO<br>(test) | 1 - SS<br>(train) | 1 - SS<br>(test) | 1 - SZ<br>(train) | 1 - SZ<br>(test) |
|-----|-------------------|------------------|-------------------|------------------|-------------------|------------------|-------------------|------------------|
| 117 | 0.135             | 0.183            | 0.215             | 0.284            | —                 | —                | 0.313             | 0.398            |
| 118 | 0.142             | 0.192            | 0.226             | 0.296            | 0.253             | 0.333            | 0.335             | 0.419            |
| 119 | 0.307             | 0.451            | 0.424             | 0.599            | 0.421             | 0.597            | —                 | —                |
| 120 | 0.320             | 0.624            | 0.427             | 0.766            | 0.423             | 0.768            | 0.532             | 0.789            |
| 121 | 0.372             | 0.437            | 0.499             | 0.587            | 0.498             | 0.587            | 0.605             | 0.689            |

Table L: Stability values for the Pareto optimal configurations in Table I. The ID column references Table I. “—” means that the configuration is not Pareto optimal for the corresponding stability measure.
